1 Adipose tissue mitochondrial respiration in Atlantic  
2 salmon: implications for sex-dependent life-history  
3 variation

4  
5 Jenni M. Prokkola\*<sup>§1,2</sup>, Anita Wagner\*<sup>3,4</sup>, Elisabeth Koskinen<sup>1</sup>, Paul V. Debes<sup>1,5</sup>, Andrew House<sup>1</sup>,  
6 Eirik R. Åsheim<sup>1,6</sup>, Craig R. Primmer<sup>1,6</sup>, Eija Pirinen<sup>3,4,7</sup>, Tutku Aykanat<sup>1</sup>

7  
8 <sup>1</sup> Organismal and Evolutionary Biology Research Programme, Faculty of Biological and  
9 Environmental Sciences, University of Helsinki, Helsinki, Finland

10 <sup>2</sup> Natural Resources Institute Finland (LUKE), Oulu, Finland

11 <sup>3</sup> Research Program for Clinical and Molecular Metabolism, Faculty of Medicine, University of  
12 Helsinki, Helsinki, Finland

13 <sup>4</sup> Research Unit of Biomedicine and Internal Medicine, Faculty of Medicine, University of Oulu, Oulu,  
14 Finland

15 <sup>5</sup> Department of Aquaculture and Fish Biology, Hólar University, Sauðárkrókur, Iceland

16 <sup>6</sup> Institute of Biotechnology, Helsinki Institute of Life Science (HiLIFE), University of Helsinki,  
17 Helsinki, Finland

18 <sup>7</sup> Medical Research Center Oulu, Oulu University Hospital and University of Oulu, Finland  
19

20 \* Equal contribution

21 <sup>§</sup> Corresponding author, [jenni.prokkola@luke.fi](mailto:jenni.prokkola@luke.fi), +358 29 532 2614, Natural Resources Institute  
22 Finland (LUKE), Paavo Havaksen tie 3, FI-90014 Oulun yliopisto, Oulu, Finland

23

24 Short title: Adipose tissue mitochondrial respiration in salmon

25 Keywords: metabolism, sexual maturation, puberty, white adipose tissue

26

27

- 28 Author contributions:
- 29 Conceptualization: JMP, AW, EP, TA
- 30 Formal analysis: JMP, AW, EP, TA
- 31 Funding acquisition: CRP, EP, TA
- 32 Investigation: JMP, AW, EK, PVD, AH, ERÅ, CRP, EP, TA
- 33 Methodology: JMP, AW, EK, PVD, CRP, EP, TA
- 34 Resources: PVD, AH, ERÅ, CRP, EP, TA
- 35 Supervision: JMP, EP, TA, CRP
- 36 Visualisation: JMP, AW, EP, TA
- 37 Writing – Original Draft Preparation: JMP, AW, EP, TA
- 38 Writing – Review & Editing: JMP, AW, EK, PVD, AH, ERÅ, CRP, EP, TA

## 39 Abstract

40 Adipose tissue is essential for energy homeostasis, with mitochondria having a central role in its  
41 function. Mitochondria-mediated white adipose tissue dysfunction has been linked to several  
42 metabolic disorders in humans but surprisingly little is known about natural variation in mitochondrial  
43 function in wild animal populations, and its evolutionary significance. Early sexual maturation (low  
44 age-at-maturity) in Atlantic salmon (*Salmo salar*) is promoted by higher adiposity and has a strong  
45 genetic association with the *vgll3* locus. This makes Atlantic salmon a convenient wild model to  
46 study the potential role of mitochondria-mediated adipose tissue processes in relation to the timing  
47 of maturation. Yet, mitochondrial respiration has not been measured in the adipose tissue in fish,  
48 and the lack of data is restricting the development of informed hypotheses. Here, using 13 Atlantic  
49 salmon individuals reared in common-garden conditions, we first verified the feasibility of measuring  
50 mitochondrial respiration in the adipose tissue. As expected, the respiration level was generally low,  
51 but nonetheless we successfully quantified its biological variation in the adipose tissue. Next, we  
52 analysed the potential association of mitochondrial respiration with mitochondrial DNA (mtDNA)  
53 content, adipocyte size, sex, and the *vgll3* genotype. Despite low samples sizes, mitochondrial  
54 respiration, leak respiration, and coupling capacity (P/E ratio) were marginally significantly  
55 decreased in immature females carrying with the *vgll3* early maturation compared to the alternative  
56 genotype. Based on these results, we suggested two new hypotheses on how the coupling capacity  
57 of oxidative phosphorylation could be linked with the timing of maturation via adiposity and pave the  
58 way to study the mechanistic relationships between life-history variation and mitochondrial  
59 bioenergetics in wild populations.

## 60 Introduction

61 Energy allocation dynamics are central to theories of life-history evolution. At the theoretical level  
62 and in ecological studies, white adipose tissue, which is the major energy storage organ in animals,  
63 is often viewed as an “inert” energy storage. Yet, white adipose tissue affects normal metabolic  
64 functions and reproductive fitness in animals in multiple ways (Ottaviani, Malagoli, & Franceschi,  
65 2011). White adipose tissue (hereafter adipose tissue) is the most abundant type of adipose tissue,  
66 localising mainly to visceral and subcutaneous depots. The main function of adipose tissue is to  
67 store the dietary energy in the form of fat (triglycerides) and allocate energy to other tissues by  
68 mobilizing stored fat during fasting and high energy demand processes such as growth and sexual  
69 maturation (Norgan, 1997). The endocrine function of adipose tissue, *i.e.*, secretion of hormones  
70 and bioactive molecules, also controls whole-body energy homeostasis and facilitates the  
71 communication between adipose tissue and other organs (Mohamed-Ali, Pinkney, & Coppack,  
72 1998). The key functions of adipose tissue are dependent on mitochondria – the organelles that  
73 produce metabolites and energy for cells (Boudina & Graham, 2014; De Pauw, Tejerina, Raes,  
74 Keijer, & Arnould, 2009; Heinonen, Jokinen, Rissanen, & Pietilainen, 2020; Martin & Obin, 2006).  
75 Surprisingly, however, mitochondrial function in the adipose tissue is poorly studied in an  
76 evolutionary sense. For example, although the modulation of energy allocation is central to the life-  
77 history theory (e.g., van Noordwijk & de Jong, 1986), whether there is natural variation in the  
78 mitochondrial function in the adipose tissue affecting life-history trait variation and fitness is  
79 unknown.

80

81 Mitochondria are dynamic organelles – their number and efficiency to produce energy (in the form of  
82 adenosine triphosphate, ATP) are affected by the energetic status of the cell, which depends on  
83 environmental conditions and tissue type, among other factors (Kadenbach, 2003; Salin et al.,  
84 2018). Mitochondrial function can be assessed by quantifying mitochondrial respiration via oxidative  
85 phosphorylation (OXPHOS), a cascade of reactions taking place across the inner mitochondrial  
86 membrane. In OXPHOS, electrons from NADH and FADH<sub>2</sub> are transferred through a chain of  
87 protein complexes, namely complexes I-IV, ubiquinone (Q) and cytochrome c, and finally to the  
88 electron acceptor oxygen (Fig. 1a). Simultaneously, complexes I, III, and IV pump protons into the  
89 mitochondrial intermembrane space, generating a proton gradient that drives the phosphorylation of  
90 ADP to ATP by the ATP synthase enzyme. The efficiency of mitochondrial respiration is determined  
91 by the proportion of electrons in OXPHOS that are ‘coupled’ to generating ATP (coupled  
92 respiration), *versus* proton leakage and electron slippage across the inner membrane (uncoupled

93 respiration) (Fig 1a). Intact tissues exhibit both coupled and uncoupled OXPHOS. Highly efficient  
94 mitochondria are tightly coupled, i.e., producing more ATPs per oxygen, but uncoupled respiration is  
95 an important mechanism in adaptation to changing environmental conditions (Brand, 2005; Salin,  
96 Auer, Rey, Selman, & Metcalfe, 2015).

97

98 Variation in the organisation and efficiency of mitochondria among individuals is likely under  
99 selection and adaptive (Salin, Auer, Rey, Selman, & Metcalfe, 2015; Salin et al., 2016; Hood et al.,  
100 2018; Koch et al., 2021). Within species, how variation in mitochondrial function could lead to  
101 variation in other traits is poorly understood but measuring the different stages and efficiency of  
102 mitochondrial respiration may provide a coherent framework (see e.g., Koch et al., (2021)). For  
103 example, the ability to increase ATP synthesis, which requires sufficient reserve capacity in the  
104 electron transport pathway, allows organisms to respond *via* mitochondria to changes in energetic  
105 demand and environmental stressors (Chacko et al., 2014; Sokolova, 2018). Likewise, although  
106 proton leak reduces the efficiency of mitochondria, it may restrict the production of reactive oxygen  
107 species and may thereby limit oxidative stress (Dennerly, 2010). Variation in mitochondrial density  
108 and processes may thus allow individuals to respond differently to energetic demands and  
109 stressors. Despite the central role of mitochondria in the control of adipose tissue function, little is  
110 known of how adipose tissue mitochondrial activity relates to growth and body condition and affects  
111 life-history traits, such as the timing of sexual maturation. The fact that obesity in humans is  
112 associated with a significant decline in adipose tissue mitochondrial respiration (Heinonen, Jokinen,  
113 Rissanen, & Pietilainen, 2020; Jokinen, Pirnes-Karhu, Pietilainen, & Pirinen, 2017) also makes it  
114 appealing to study adipose tissue mitochondria in relation to life-history decisions in other species.

115

116 Life-history variation is largely shaped by energy allocation differences and maintained within  
117 species via evolutionary trade-offs (Lailvaux & Husak, 2014). In Atlantic salmon (*Salmo salar*),  
118 earlier maturation shortens generation time and increases the survival probability prior to  
119 reproduction compared to delayed maturation, but this comes at the expense of a smaller size at  
120 maturity, which is associated with lower fecundity (Fleming, 1998). The Atlantic salmon is an  
121 emerging wild model species to study the energetic basis of life-history adaptations for two main  
122 reasons (Mobley et al., 2021; Prokkola et al., 2022). First, faster accumulation of adipose tissue,  
123 quantified as a high condition factor is associated with earlier sexual maturation in salmon (Debes et  
124 al., 2021; House et al., 2021; Rowe, Thorpe, & Shanks, 1991). Second, a single genomic region  
125 explains a substantial amount of variation in age-at-maturity (Barson et al., 2015). The strongest  
126 candidate gene in this region, *vgll3* (Sinclair-Waters et al., 2020), is likely important for adipose

127 tissue growth and function. In mice, for example, expression of *vgll3* was negatively correlated with  
128 adipose tissue mass and body weight (Halperin, Pan, Lusia, & Tontonoz, 2013). Likewise, in  
129 humans, variation in the *VGLL3* locus is associated with the timing of puberty (Cousminer et al.,  
130 2013; Elks et al., 2010). Finally, *vgll3* early maturation genotype is linked to a temporal increase in  
131 body condition in salmon (Debes et al., 2021). Therefore, adipose tissue energetics could provide a  
132 functional basis for variation in age-at-maturity, and subsequently, for potential evolutionary  
133 constraints (Moblely et al., 2021; Prokkola et al., 2022). Yet, the lack of information on the empirical  
134 and theoretical premises, combined with relatively challenging and costly experimental design and  
135 methodological procedures (see below, Materials and Methods), restricts statistically powerful and  
136 hypothesis-driven experiments.

137

138 In this study, we first verified the feasibility of measuring variation of mitochondrial respiration in the  
139 visceral adipose tissue – which consists almost entirely of adipocytes (Weil et al., 2012) – of Atlantic  
140 salmon. Next, we aimed to gain the first insights into preliminary associations between mitochondrial  
141 respiration and mitochondrial DNA (mtDNA) content, adipocyte size, sex, and the *vgll3* genotype,  
142 albeit using relatively small sample sizes. Based on our findings, we suggested two novel  
143 hypotheses on how oxidative phosphorylation could be linked with the timing of maturation via  
144 adiposity and pave the way for future studies of the mechanistic relationships between life-history  
145 variation and mitochondrial bioenergetics in wild populations.

146

## 147 Material and Methods

### 148 **Fish rearing and sampling**

149 The experiment was approved by the Finnish Animal Experiment Board (ESAVI/42575/2019).  
150 Samples of adipose tissue were collected during August-September 2020 from fish reared as part of  
151 another study (Åsheim et al., 2022) (here, we collected samples only from Neva population  
152 individuals from the warm temperature treatment). The fish were approximately 2 years 8 months  
153 post hatch (average mass 1 kg; Table 2). Details of fish rearing, feeding, and temperatures are  
154 shown in (Åsheim et al., 2022) until Feb 2020 (in Feb-Aug 2020, conditions largely followed those in  
155 2019). The mean ( $\pm$  SD) temperature for the tanks included in this study during the sampling period  
156 was  $11.7 \pm 0.8$  °C. Table 2 shows a summary of the number of fish used and their distribution  
157 among the experimental variables.

158

159 The fish were fasted for ~57 h prior to sampling. One day prior to sampling, the individuals, which  
160 had been previously tagged with passive integrated transponders (PIT-tags) and identified for *vgll3*  
161 genotype and sex, were selected for sampling, anaesthetised with buffered tricaine  
162 methanesulfonate (MS-222, 0.125 g/L, sodium bicarbonate buffered), and measured for body mass  
163 (to the nearest 0.1 g) and fork length (to the nearest mm). After measurement, the fish were placed  
164 in a floating cage held inside the rearing tank until sampling the following day. The sampling was  
165 balanced in terms of sex and *vgll3* genotypes across four sampling days (from in total four tanks),  
166 on which four individuals (one female and one male of both EE and LL genotypes, referring to  
167 homozygous early and late maturation genotypes, respectively) from within the same rearing tank  
168 were captured by netting each day and euthanized with an overdose of MS-222 (0.250 g/L, sodium  
169 bicarbonate buffered). Fish were sampled from a different rearing tank between 8:40 and 11:40 AM  
170 on each day of sampling; three tanks had been reared with normal feed used in Atlantic salmon  
171 aquaculture (control), and one tank with a low-fat feed diet (details in (Åsheim et al., 2022)). Visceral  
172 adipose tissue samples were collected using sterilized equipment within ~30 min of euthanasia and  
173 1) stored in BIOPS (2.77 mM CaK<sub>2</sub>EGTA, 7.23 mM K<sub>2</sub>EGTA, 20 mM imidazole, 20 mM taurine, 50  
174 mM MES hydrate, 0.5 mM DTT, 6.56 mM MgCl<sub>2</sub>, 5.77 mM ATP and 15 mM phosphocreatine (Canto  
175 & Garcia-Roves, 2015)), or 2) flash-frozen in liquid nitrogen and stored at -80 °C. All reagents were  
176 purchased from Sigma-Aldrich/Merck unless mentioned otherwise. Samples in BIOPS were kept on  
177 ice and transported to Meilahti campus, University of Helsinki, for mitochondrial respiration  
178 measurements (see schematic illustrations Fig. 1b-d). Due to the time-consuming nature of the  
179 measurement and requirement of fresh tissue, at most four samples were analysed each day. After  
180 sample collection, all following analyses were performed blind with respect to the diet treatment,  
181 genotype, and sex of fish.

182  
183 The maturation status of the fish was determined from the appearance of gonads. All males had  
184 partially enlarged gonads indicating that the maturation process had started (the gonads of most of  
185 the remaining males in the experimental population were fully matured roughly two months after the  
186 sampling [E. Å., personal observation]), and all females had immature gonads, i.e., small eggs that  
187 covered only a small part of the body cavity, except one female that showed more advanced  
188 maturation indicated by gonad mass that was on average 30 times larger than in the other females.  
189 The maturing female was excluded from the analyses.

190

## 191 **High-resolution respirometry**



192 Visceral adipose tissue stored in BIOPS buffer was used in high-resolution respiration  
 193 measurements with Oxygraph-2k equipment (O2k, Oroboros Instruments, Innsbruck, Austria)  
 194 (Fig.1d). Adipose tissue was dried by blotting on a tissue paper and weighed before placing it into a  
 195 calibrated chamber with the Mir05 buffer (0.5 mM EGTA, 3 mM MgCl<sub>2</sub>, 60 mM lactobionic acid, 20  
 196 mM taurine, 10 mM KH<sub>2</sub>PO<sub>4</sub>, 20 mM HEPES, 110 mM D-sucrose, 1 g/L BSA), (Canto & Garcia-  
 197 Roves, 2015) (Fig 1c). We used 28–50 mg adipose tissue in each measurement (Tables 2 and S2).  
 198 The measurements were performed at 12 °C under constant stirring (750 rpm) and oxygen  
 199 concentration was kept above 250 μM. Oxygen flux was calculated as means over ~1 min within  
 200 each measured parameter after a stable flux was achieved.

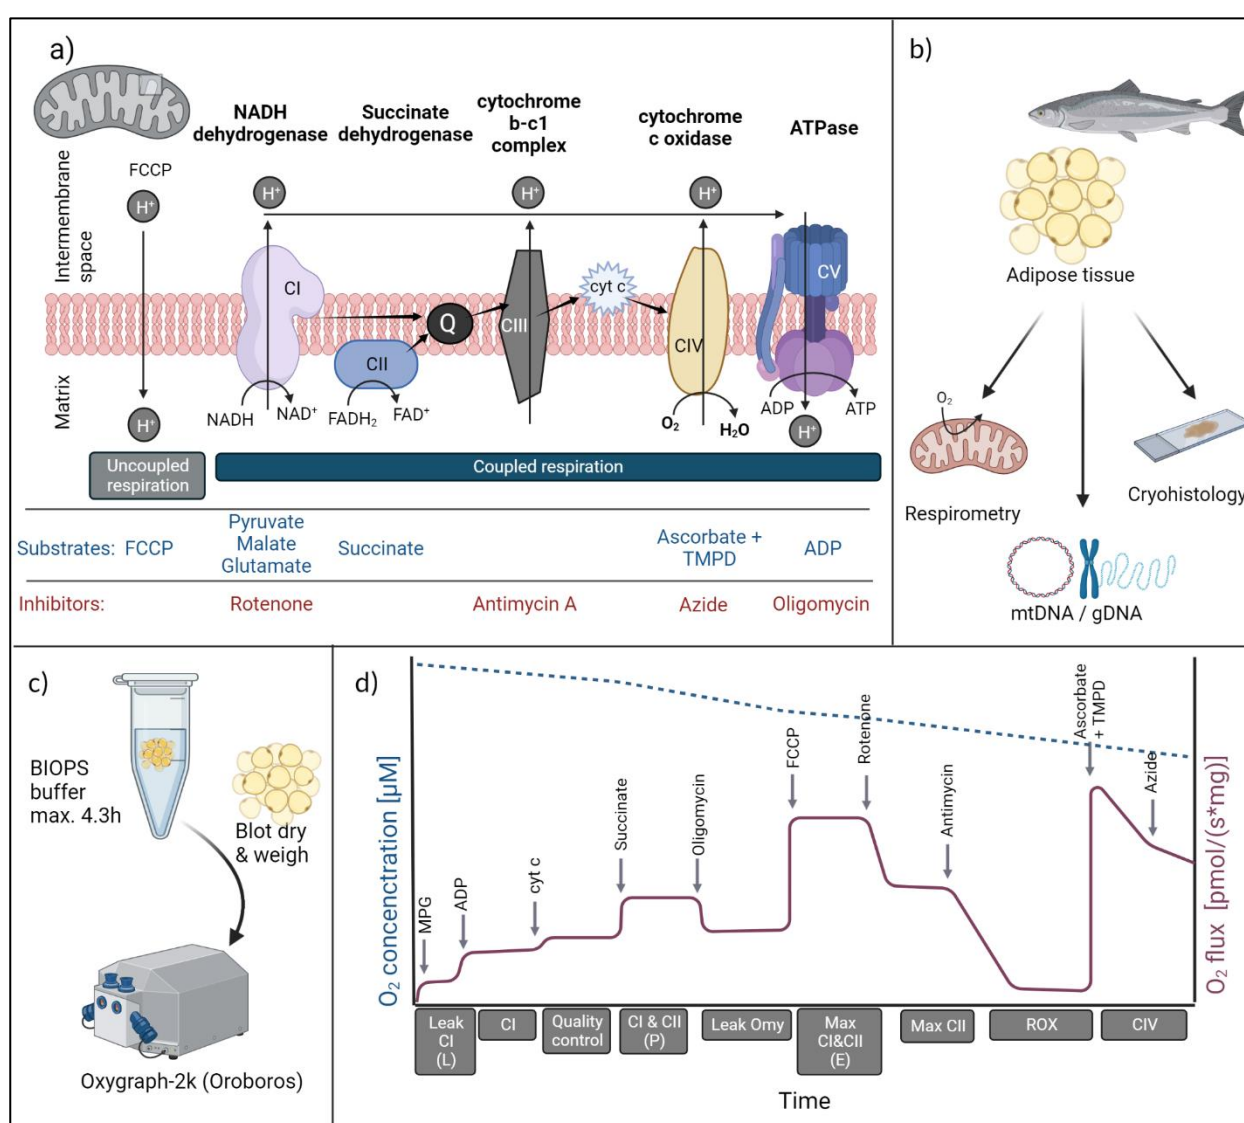

201

202 Fig. 1. A schematic illustration of oxidative phosphorylation (OXPHOS), the study design, and the  
 203 substrate-uncoupler-inhibitor respirometry protocol. (a) OXPHOS and the relevant respiration  
 204 substrates and inhibitors used in this study. Electrons are shown as tapered black arrows. (b-c) The



205 methodologies applied for visceral adipose tissue samples. (d) A schematic illustration of the  
206 injection protocol used in high-resolution respirometry with the Oxygraph 2k, with anoxygen flux  
207 curve in purple. The calculated respiration parameters are shown below the x-axis (d). MPG =  
208 malate, pyruvate, glutamate. ROX = residual oxygen flux. Figures created with BioRender.  
209

210 Substrate-uncoupler-inhibitor respirometry protocol (Fig. 1d) was used to determine LEAK  
211 (dissipative, non-OXPHOS respiration), OXPHOS (respiration coupled to phosphorylation of ADP to  
212 ATP) and ETS (electron transfer system uncoupled from the phosphorylation) respiration states.  
213 The stock solutions and final concentrations of substrates, uncoupler, and inhibitors used are  
214 presented in Table 1. To determine CI - mediated leak respiration, the NADH-pathway substrates  
215 malate, pyruvate and glutamate were added. After a stable plateau was formed, ADP at the  
216 saturating concentration was premixed with MgCl and added to induce coupled phosphorylating CI  
217 (NADH)-linked respiration. Mitochondrial outer membrane integrity was evaluated by the lack of  
218 response to the addition of cytochrome c. Next, to measure CI & CII -mediated respiration,  
219 succinate was injected to induce the electron flow through CII. After O<sub>2</sub> flux was stabilised, the ATP  
220 synthase inhibitor, oligomycin, was added to determine CI&CII mediated leak respiration. To  
221 measure the maximal ETS capacity of CI&CII-linked respiration, the stepwise addition of the  
222 uncoupler carbonyl cyanide-p-trifluoromethoxyphenylhydrazone (FCCP) (Abcam) was performed.  
223 This was followed by inhibition of CI with rotenone to determine the maximal ETS capacity via CII.  
224 After blocking electron transfer with antimycin, the complex III inhibitor, residual oxygen flux (ROX)  
225 was quantified. Complex IV (CIV) activity was determined by adding N,N,N',N'-Tetramethyl-p-  
226 phenylenediamine dihydrochloride (TMPD) as a substrate in conjunction with the reducing agent  
227 ascorbate. Complex IV was inhibited with sodium azide to correct previous results for the chemical  
228 auto-oxidation of reagents (Djafarzadeh & Jakob, 2017). Oxygen flux was quantified using the  
229 DatLab analysis software (Canto & Garcia-Roves, 2015). ROX was subtracted from all except CIV-  
230 related values. The delay until the respiration measurements started after the fish were euthanized  
231 ranged from 1.8 to 4.3 h but this was not correlated with oxygen flux during the measurements (Fig.  
232 S1).

233

234 Table 1. The used reagent concentrations and their respective respiration parameters and states.

235

| Reagent | Site of action | Stock solution | Final concentration | Parameter | Respiration state |
|---------|----------------|----------------|---------------------|-----------|-------------------|
|---------|----------------|----------------|---------------------|-----------|-------------------|

|                                                                                        |                                        |                      |                                                                                     |                                  |        |
|----------------------------------------------------------------------------------------|----------------------------------------|----------------------|-------------------------------------------------------------------------------------|----------------------------------|--------|
| Malate /l-malic acid (M)<br>Pyruvate/Pyruvic acid (P)<br>Glutamate/l-Glutamic acid (G) | Complex I<br>substrate                 | 400 mM<br>2 M<br>2 M | 2 mM<br>10 mM<br>10 mM                                                              | Leak CI (L)                      | LEAK   |
| Adenosine diphosphate (ADP)<br>Magnesium chloride (MgCl)                               | ATP synthase<br>substrate              | 500 mM<br>300 mM     | 5 mM<br>2.5 mM                                                                      | CI                               | OXPHOS |
| Cytochrome c (Cyt c)                                                                   | Test of outer<br>membrane<br>integrity | 4 mM                 | 10 µM                                                                               | Quality control                  |        |
| Succinate (Suc)                                                                        | Complex II<br>substrate                | 1 M                  | 10 mM                                                                               | CI&CII (P)                       | OXPHOS |
| Oligomycin (Omy)                                                                       | Inhibitor of<br>ATP synthase           | 5 mM                 | 2.5 µM                                                                              | Leak Omy                         | LEAK   |
| Carbonyl cyanide-p-<br>trifluoromethoxy-<br>phenylhydrazine (FCCP)                     | Uncoupler of<br>ETS                    | 1 mM                 | Titration in 0.5 µM<br>to 1.2 µM (1-3 µL)<br>steps. Final<br>concentration 18<br>µM | Max CI&CII (E)                   | ETS    |
| Rotenone (R)                                                                           | Inhibitor of CI                        | 1 mM                 | 0.5 µM                                                                              | Max CII                          | ETS    |
| Antimycin A (Ama)                                                                      | Inhibitor of CIII                      | 5 mM                 | 2.5 µM                                                                              | Residual<br>oxygen flux<br>(ROX) |        |
| Tetramethylphenylendiamin<br>(TMPD)                                                    | CIV substrate                          | 200 mM               | 0.5 mM                                                                              | CIV                              | ETS    |
| Ascorbate (Asc)                                                                        | Reducing<br>agent for<br>TMPD          | 800 mM               | 2 mM                                                                                | CIV                              | ETS    |
| Azide (Az)                                                                             | Inhibitor of<br>CIV                    | 4 M                  | 20 mM                                                                               | CIV                              | ETS    |

236

237 We calculated mitochondrial respiration coefficients from tissue mass -normalised parameters  
 238 shown in Table 1 and Fig. 1d as follows: *NADH pathway cofactor (NADH)*: CI / CI&CII, indicating the  
 239 proportion of CI respiration from CI & CII respiration; *Succinate pathway cofactor (Succ)*: 1 - CI /  
 240 CI&CII, indicating the proportion of CII respiration from CI & CII respiration; *Coupling efficiency*

241 (*CoupEff*): (CI&CII - Leak Omy) / CI&CII, indicating the proportion of ATP synthesis -linked  
242 respiration from CI & CII respiration; *Coupling control ratio (L/P)*: Leak CI / CI&CII, indicating the  
243 proportion of CI-linked proton leak from CI & CII respiration; and *Coupling capacity (P/E)*: CI&CII /  
244 max CI&CII, indicating the proportion of phosphorylating, coupled CI & CII mediated respiration from  
245 non-phosphorylating, uncoupled CI & CII mediated respiration.

246

#### 247 **Measurements of mitochondrial DNA content**

248 We quantified mtDNA amount relative to nuclear genomic DNA (gDNA) as a proxy for mitochondrial  
249 content per cell (Robin & Wong, 1988) to understand whether mitochondrial respiration variation  
250 was explained by differences in mitochondrial number. The tissue used in this procedure was  
251 collected at the same time as the sample used in the high-resolution respiration measurements.  
252 First, DNA was extracted using a slightly modified conventional phenol-chloroform extraction.  
253 Phenol chloroform extraction conserves different sizes of DNA relatively similarly compared to silica  
254 column-based extraction protocols, hence exhibiting higher reproducibility when quantifying mtDNA  
255 to gDNA ratio (Guo, Jiang, Bhasin, Khan, & Swerdlow, 2009). Briefly, approximately 100 mg of  
256 adipose tissue and a 7 mm metal bead were placed in a 2 mL centrifuge tube containing 0.5 mL  
257 PBS buffer (pH 7.4) and homogenised in TissueLyser II (Qiagen) for 2 minutes at 25 Hz. The  
258 homogenate was then incubated overnight at 37 °C in 0.6 mL lysis buffer (10 mM Tris-HCl, 1 mM  
259 EDTA, and 0.1% SDS, pH 8.0) with 7 µL proteinase K solution (20 mg/mL), and then treated with  
260 RNAase (0.2 mg/mL) for 30 min at 37 °C. Next the solution was treated with 600 µL phenol (VWR,  
261 Tris-buffered, pH=6.6) twice, followed by two 500 µL chloroform isoamyl alcohol (24:1) washes. A  
262 1:10 volume of sodium acetate (3 M, pH 5.2) and 2.5 volumes of ice-cold ethanol were then added  
263 to the aqueous phase and samples were incubated for 30 min at -20 °C. The precipitated DNA was  
264 then washed twice with 70 % ethanol, air dried for 30 min, and resuspended in 50 µL TE solution (5  
265 mM Tris, 0.1 mM EDTA, pH 8.0) for 15 min at 37 °C. DNA quality and quantity were assessed using  
266 Nanodrop 2000 (Thermo Scientific) and DNA concentration was adjusted to 5 ng/µL. All samples in  
267 the analyses had 260/280 ratios greater than 1.80 (average = 1.90, SD = 0.05), indicating high  
268 purity. DNA was extracted in two batches for n = 12, and n = 8 samples, respectively, where four  
269 samples were extracted twice to control for batch effects (totalling 16 samples); these samples were  
270 run in six replicate reactions, while the others were run in triplicates.

271

272 Next, quantitative real-time PCR (qPCR) was performed using a double-stranded DNA-binding dye  
273 as a reporter (HOT FIREPol EvaGreen qPCR Supermix, Solis Biodyne), in a 384-plate format using  
274 a Biorad CFX384 C1000 thermal cycler. We targeted two mitochondrial (*16s* and *cytb*), and two

275 nuclear (*app*, *EF1a*) genomic regions using a double-stranded DNA-binding dye (eva green) as a  
276 reporter. Primers specific to these genomic regions were designed with Primer-BLAST (Ye et al.,  
277 2012), where the melting temperature ( $T_m$ ) and product size were adjusted to 59–61 °C, and 90–  
278 150 bp, respectively (Table A1).

279  
280 The qPCRs were run for 45 cycles at 95 °C, 58 °C, and 72 °C for 15, 20, and 20 s, respectively,  
281 following initial denaturation at 95 °C for 12 min. The volume of reactions was 10  $\mu$ L, with 2  $\mu$ L 5x  
282 HOT FIREPol EvaGreen qPCR Supermix (Solis Biodyne, Tartu, Estonia), 150 nM of each primer,  
283 and 5  $\mu$ L diluted DNA (total 1.67 ng). Samples were analysed in triplicates for each marker.

284  
285 The relative mtDNA to gDNA amount, where gDNA amount was first divided by two to account for  
286 two copies of gDNA per cell, was then quantified from mean expression across replicate reactions  
287 using an efficiency-corrected method (Pfaffl, 2001). Ct values and PCR efficiencies were calculated  
288 using LinregPCR (Ruijter et al., 2009), where baseline correction and window-of-linearity analysis  
289 (the cycles with the highest linear correlation) was performed separately for each well and the  
290 efficiency of each primer set was calculated as the mean of individual wells' efficiency.

291

## 292 **Measurements of adipocyte size**

293 Flash-frozen samples of visceral adipose tissue were sectioned to assess whether adipocyte size  
294 correlated with mitochondrial respiration. Samples were embedded in the Optimal Cutting  
295 Temperature compound and sectioned to 20–30  $\mu$ m at 50 °C using a cryostat (Leica CM 3050S)  
296 and stained with haematoxylin & eosin using Sakuras Tissue-Tek DRS 2000 at the Department of  
297 Anatomy, University of Helsinki following a standard protocol. In brief, cryosections were fixed with  
298 ice-cold acetone for 10 min on ice, air dried for 30 min, washed twice with PBS for 1 min, incubated  
299 in PBS for 10 min, washed in water for 1 min, stained with Mayer's hemalum solution (Merck) for 5  
300 min, washed with tap water for 1 min, incubated in distilled water for 1 min, stained with May-  
301 grunwald's eosin-methylene blue solution modified (Merck) for 3 min, and washed in tap water for 1  
302 min, and twice each in 96 % ethanol for 20 s, Abs ethanol 5 min, and Xylene 2 min. Finally, slides  
303 were covered with Pertex mounting medium (Histolab).

304

305 The slides were imaged using 20x magnification with extended plane, using 3DHISTECH  
306 Panoramic 250 FLASH II digital slide scanner. Images were inspected in Qupath v. 0.3.0  
307 (Bankhead et al., 2017) and 1–2 regions containing visceral adipose tissue from each image were  
308 saved in tiff format. Tiff-images were analysed in ImageJ to measure the size of particles with a size

309 of 1000–100000 and circularity of 0.2–1.00 as size and shape filters (used macro in Supplemental  
310 Material). The selected cells were visually inspected to exclude selections that were merged or  
311 multiple cells, were stretched (during sectioning) or had a very irregular shape because of excess  
312 dye. The remaining selected cells were measured (area in  $\mu\text{m}^2$ ) (see Fig. 2a for a representative  
313 image). The number of cells identified with this method ranged from 40 to 306 between individuals  
314 due to the variable size and quality of the sections. However, the number of measured cells was not  
315 correlated with mean (Spearman-rho = -0.24,  $p = 0.426$ ) or median (Spearman-rho = -0.26,  $p =$   
316 0.388) adipocyte size, indicating that there was no size bias due to the number of cells measured  
317 (Fig. S2).

318

### 319 **Data analysis**

320 The size, *vgll3* genotype and respiration data for each individual are provided in Table S2.

321 Respiration was successfully measured from adipose tissues of 14 individuals (nine females, five  
322 males) after data from two males were omitted due to abnormal noise in the data (both with the  
323 early maturation *vgll3* genotype). Leak CI was not determined for three individuals due to abnormal  
324 fluxes. Cryosections for adipocyte size measurements were obtained from 14 individuals (seven of  
325 each sex, after two females were omitted from the analysis due to low section quality). Two males  
326 without respiration data were included in the adipocyte size measurements. One female that  
327 displayed stronger maturation than all others was omitted from the dataset, since salmon consume  
328 the energy stored in adipose tissue during maturation, hence the maturation status likely affects the  
329 results (Rowe et al., 1991). Given that all the remaining females in this study were immature, and all  
330 males were maturing, sex effects are confounded with maturation status throughout the study,  
331 which is taken into account when interpreting the result.

332

333 Oxygen fluxes were normalised to tissue mass as well as to both tissue mass and mtDNA amount.  
334 To compare the respiration data of individuals with different *vgll3* genotypes, we focussed on data  
335 from females, as we only obtained data from two early maturation (*vgll3*<sup>\*EE</sup>) -genotype males.

336

337 The data were analysed in the R software environment (R Core Team, 2019), and visualised using  
338 ggplot2 (Wickham, 2009). We tested the statistical significance of feed treatment and sex effects  
339 and of genotype effects in females using non-parametric Wilcoxon rank sum tests and Spearman's  
340 rank correlations to avoid violations of linear model assumptions due to low sample sizes. In line  
341 with the exploratory nature of this study, multiple-test correction, which is also restrictively  
342 conservative at small samples sizes, was not employed.

343

## 344 Results

### 345 *Data overview and feed treatment effects*

346 Because samples were obtained from salmon under different feeding treatments, we first  
 347 determined the effect of diet fat content on fish phenotypes. No effects of feeding treatment were  
 348 detected on fish morphology (Table 2) or respiration traits (see Fig. 2b and Fig. 3-4, where feed  
 349 treatments are shown with different symbols, and Table S3) except adipocytes were significantly  
 350 larger in salmon reared under a control diet than a low-fat diet, as expected (Table 2). Data from the  
 351 two feeding treatments were combined to improve statistical power of the subsequent analyses.

352

353 Table 2. Summary of final data sets and fish phenotypes (mean  $\pm$  SD) from control (C) and low fat (LF) feed  
 354 treatments. All differences between treatments were non-significant, apart from adipocyte size (results  
 355 shown in footnotes). Resp = mitochondrial respiration, hist = cryohistology. Full data is provided in Table S1.

| Feed | Sex | n (resp) | n (resp. <i>vgll3</i> early/late) | n (hist.) | Tissue mass resp (mg) | Fish mass (g)      | Fish length (cm) | Condition factor | Gonad mass (g)  | Adipocyte size ( $\mu\text{m}^2$ ) | MtDNA/gDNA       |
|------|-----|----------|-----------------------------------|-----------|-----------------------|--------------------|------------------|------------------|-----------------|------------------------------------|------------------|
| C    | F   | 6        | 4/2                               | 4         | 41.7 $\pm$ 6.7        | 973.8 $\pm$ 521.8  | 40.6 $\pm$ 8.1   | 1.31 $\pm$ 0.09  | 2.1 $\pm$ 1.8   | 4665.1 $\pm$ 675.5                 | 94.3 $\pm$ 39.7  |
|      | M   | 4        | 1/3                               | 5         | 40.4 $\pm$ 7.9        | 1065.4 $\pm$ 462.6 | 41.3 $\pm$ 6.2   | 1.45 $\pm$ 0.14  | 87.8 $\pm$ 23.6 | 3749 $\pm$ 274.9                   | 126.0 $\pm$ 30.9 |
| LF   | F   | 2        | 1/1                               | 2         | 42.6 $\pm$ 1.6        | 1244.2 $\pm$ 17.3  | 46.4 $\pm$ 0.1   | 1.25 $\pm$ 0.01  | 5.1 $\pm$ 3.3   | 3143.4 $\pm$ 605.3                 | 83.0 $\pm$ 7.6   |
|      | M   | 1        | 1/0                               | 2         | 40.9                  | 1110 $\pm$ 164.8   | 44.5 $\pm$ 3.6   | 1.27 $\pm$ 0.12  | 67.8 $\pm$ 21.6 | 2575.3 $\pm$ 787.3                 | 133.4 $\pm$ 1.8  |

#### Wilcoxon rank sum tests:

Control vs. LF: Fish mass  $W=18.0$ ,  $p = 0.648$ ; Fish length  $W = 15.5$ ,  $p = 0.433$ ; Condition  $W = 35.0$ ,  $p = 0.103$ ; Gonad mass  $W=19.0$ ,  $p = 0.744$ ; Adipocyte size  $W = 34.0$ ,  $p = 0.017$ ; mtDNA/gDNA  $W = 23.0$ ,  $p = 0.948$

F vs. M: Fish mass  $W = 29$ ,  $p = 0.954$ ; Fish length  $W = 28$ ,  $p = 1.000$ ; Condition  $W = 12$ ,  $p = 0.073$ ; Adipocyte size  $W = 31$ ,  $p = 0.175$ , mtDNA/gDNA  $W = 10$ ,  $p = 0.043$

356

357



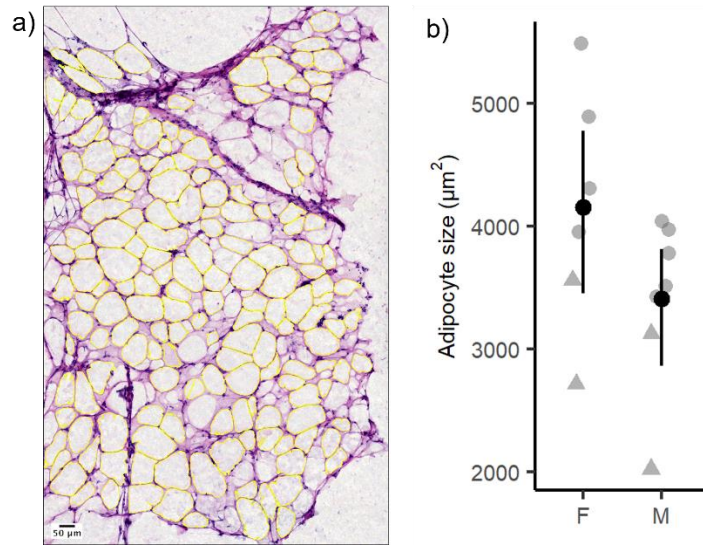

358

359 Fig. 2. Atlantic salmon adipocyte morphology. (a) Light microscope image of a representative H&E-stained  
360 cryosection of visceral adipose tissue. Measured cells highlighted in yellow (see Material & Methods section  
361 Measurement of adipocyte size). Fifty µm scale bars shown on the image, magnification 20X. (b) Mean  
362 adipocyte size (black points) ± 95 % bootstrapped confidence intervals in Atlantic salmon females and males  
363 ( $n_{\text{fem}} = 6$ ,  $n_{\text{male}} = 7$ ) (Wilcoxon rank sum test, Table 2,  $p = 0.175$ ). Grey symbols show individual data points:  
364 circles = control, triangles = low fat.  
365

### 366 *Sex differences*

367 All males had enlarged gonads verifying that maturation had been initiated. Females were immature  
368 (see also Materials and methods). Males had a higher relative mtDNA amount than females (Table  
369 2; Fig. 3a), but mitochondrial respiration did not differ between the sexes after the data were  
370 normalised either with tissue mass, or tissue mass and relative mtDNA amount (Table 3; Fig. 4a-b).  
371 This result was corroborated also by a lack of difference between the sexes in mitochondrial  
372 respiratory coefficients (Fig. S3). Interestingly, in both sexes CI-mediated respiration (NADH  
373 pathway cofactor) was substantially higher than CII-mediated respiration (succinate pathway  
374 cofactor) (Fig. S3), suggesting a generally higher preference for NADH-driven electron transfer in  
375 salmon visceral adipose tissue. There were no sex differences in any other morphological  
376 phenotypes measured nor in adipocyte size (Table 2; Fig. 2b).

377



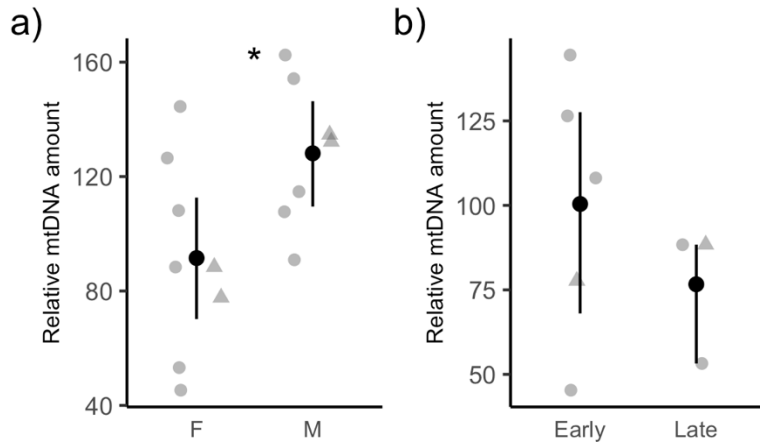

378

379 Fig. 3. Relative mtDNA amount means  $\pm$  95 % bootstrapped confidence intervals in (a) different sexes and (b)  
 380 only females carrying *vgII3* genotypes related to either early or late maturation.  $n_{\text{fem}} = 8$ ,  $n_{\text{male}} = 7$ ,  $n_{\text{early}} = 5$ ,  
 381  $n_{\text{late}} = 3$ . Wilcoxon rank sum tests: (a)  $W = 10$ ,  $p = 0.043$  (asterisk), (b)  $W = 10$ ,  $p = 0.551$ . Grey points show  
 382 individual data points: circles = control, triangles = low fat.  
 383

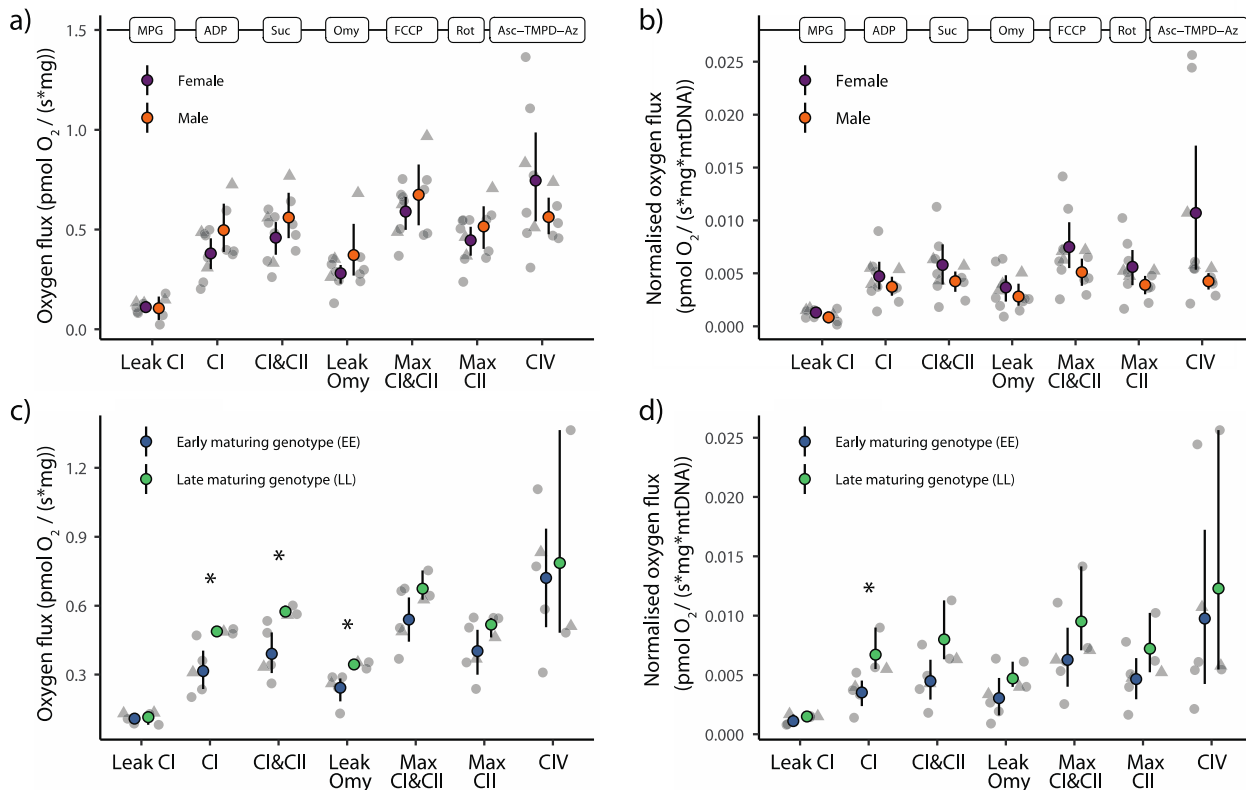

384

385 Fig. 4. Mitochondrial respiration in Atlantic salmon adipose tissue across sexes (a,b) and *vgII3* genotypes  
 386 (c,d). (a) and (c) mitochondrial respiration normalised to tissue mass, (b) and (d) mitochondrial respiration  
 387 normalised to mtDNA amount in both sexes and genotypes.  $n_{\text{fem}} = 8$ ,  $n_{\text{male}} = 5$ ,  $n_{\text{early}} = 5$ ,  $n_{\text{late}} = 3$ . Added  
 388 compounds for respiration measurements are shown in chronological order over the plots (see Fig. 1d).  
 389 Coloured points show means with bootstrapped 95% confidence intervals. Asterisks in (c) and (d):  $p = 0.036$

390 (Wilcoxon rank sum test, Table 3). Grey points show individual data points: circles = control, triangles = low  
391 fat.

392  
393 Table 3. Results of Wilcoxon rank sum tests of sex- and genotype effects on mitochondrial respiration  
394 parameters normalised with tissue mass, or with tissue mass and mtDNA amount. For n see Tables 2 and 4.  
395 Significant p-values in bold.

| Comparison                  | Variable   | Mass corrected |              | Mass & mtDNA corrected |              |
|-----------------------------|------------|----------------|--------------|------------------------|--------------|
|                             |            | W              | p            | W                      | p            |
| Female vs. Male             | Leak CI    | 12             | 1.000        | 17                     | 0.352        |
|                             | CI         | 12             | 0.272        | 27                     | 0.354        |
|                             | CI&CII     | 14             | 0.421        | 27                     | 0.354        |
|                             | Leak Omy   | 15             | 0.510        | 27                     | 0.354        |
|                             | Max CI&CII | 16             | 0.608        | 28                     | 0.284        |
|                             | Max CII    | 11             | 0.213        | 29                     | 0.222        |
|                             | CIV        | 27             | 0.341        | 33                     | 0.065        |
| <i>Vgll3</i> Early vs. Late | Leak CI    | 4              | 1.000        | 3                      | 0.700        |
|                             | CI         | <b>0</b>       | <b>0.036</b> | <b>0</b>               | <b>0.036</b> |
|                             | CI&CII     | <b>0</b>       | <b>0.036</b> | 2                      | 0.143        |
|                             | Leak Omy   | <b>0</b>       | <b>0.036</b> | 3                      | 0.250        |
|                             | Max CI&CII | 4              | 0.371        | 2                      | 0.143        |
|                             | Max CII    | 4              | 0.371        | 2                      | 0.143        |
|                             | CIV        | 8              | 1.000        | 6                      | 0.786        |

396

397

### 398 *Vgll3* effects on mitochondrial traits

399 To explore the relationship between *vgll3* genotypes and mitochondrial respiration, we focussed  
400 only on female salmon (Table 4) due to the limited availability of data from males with *vgll3*\*EE  
401 genotype. We found that CI- and CI&CII -mediated respiration were significantly higher in  
402 individuals with the late maturation genotype compared to those with the early maturation genotype  
403 of *vgll3* ( $p = 0.036$ ; Table 3; Fig. 4c). In line with the higher respiration, CI&CII -linked respiratory  
404 leak (Leak Omy) was significantly elevated in individuals with the late maturation genotype ( $p =$   
405  $0.036$ ; Table 3; Fig. 4c). Consequently, there was no difference between the genotypes in ATP  
406 synthesis-linked respiration rate, i.e., Leak Omy subtracted from CI&CII (mean (bootstrapped 95%  
407 C.I.): Early = 0.148 (0.0761, 0.218) and Late = 0.230 (0.207, 0.275), Wilcoxon rank sum test  $W = 4$ ,  
408  $p = 0.371$ ). We then asked whether the genotype effects were mediated by the mtDNA amount – as  
409 a proxy of mitochondrial density – and found no significant differences ( $p = 0.551$ ; Fig. 3b). Finally,  
410 when respiration was normalised to mtDNA amount within the same individuals, the differences  
411 were insignificant in CI&CII-mediated respiration but remained significant in CI-mediated respiration  
412 ( $p = 0.036$ ; Table 3; Fig. 4d). There were no significant effects of genotype on the other respiration

413 traits (Table 3; Fig. 4c, d). *Vgll3* genotype effects were also mostly absent in respiration coefficients.  
 414 However, the coupling capacity, P/E, of individuals carrying the late maturation genotype was  
 415 marginally higher than of those carrying the early maturation genotype ( $p = 0.071$ , Fig. 5).

416

417 Table 4. Summary of female salmon phenotypes (mean  $\pm$  SD) across early maturation (*vgll3*\*EE) and late  
 418 maturation (*vgll3*\*LL) genotypes. No significant differences between genotypes (see footnotes). Resp =  
 419 mitochondrial respiration.

| Genotype | n (resp) | Fish mass (g)     | Fish length (cm) | Condition factor | Gonad mass (g) | Adipocyte size ( $\mu$ m) | MtDNA/gDNA       |
|----------|----------|-------------------|------------------|------------------|----------------|---------------------------|------------------|
| Early    | 5        | 1135.4 $\pm$ 481  | 43.2 $\pm$ 7.4   | 1.31 $\pm$ 0.10  | 3.7 $\pm$ 2.7  | 4354.1 $\pm$ 1195.2       | 100.4 $\pm$ 39.5 |
| Late     | 3        | 884.8 $\pm$ 462.8 | 40.2 $\pm$ 8.3   | 1.26 $\pm$ 0.01  | 1.6 $\pm$ 1.1  | 3765.5 $\pm$ 274.4        | 76.7 $\pm$ 20.3  |

Wilcoxon rank sum tests

Early vs. Late: Fish mass  $W = 10$ ,  $p = 0.551$ ; Fish length  $W = 10$ ,  $p = 0.551$ ; Condition  $W = 9$ ,  $p = 0.766$ ; Gonad mass  $W = 12$ ,  $p = 0.233$ ; Adipocyte size  $W = 6$ ,  $p = 0.487$ , mtDNA/gDNA  $W = 10$ ,  $p = 0.551$ .

420

421

422

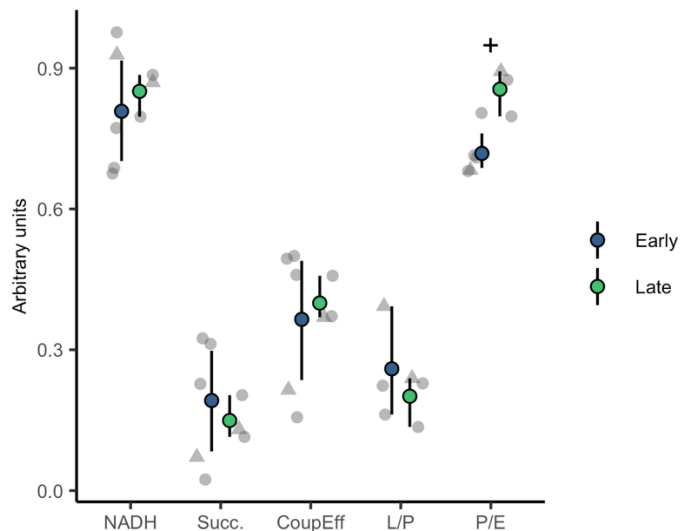

423

424 Fig 5. Respiration coefficients in female salmon with different *vgll3* genotypes. The plus sign shows  
 425 marginally higher coupling capacity (P/E) in the late than early maturation genotype ( $W = 1$ ,  $p = 0.071$ ,  
 426 Wilcoxon rank sum test,  $n_{\text{early}} = 5$ ,  $n_{\text{late}} = 3$ ). Coloured points show means with bootstrapped 95% confidence  
 427 intervals. Grey symbols show individual data points: circles = control, triangles = low fat treatment.

428

#### 429 *Correlations among fish phenotypes and mitochondrial respiration*

430 We calculated Spearman's rank correlations between mitochondrial respiration values and fish  
 431 phenotypic data, including body mass, condition factor, relative mtDNA amount and adipocyte size.

432 There was a marginally significant negative correlation between mtDNA amount and CIV -mediated  
433 respiration ( $\rho = -0.49$ ,  $p = 0.089$ , Fig. S4a), but none of the other correlations were significant ( $p >$   
434  $0.1$ ) (Table S4).

435

## 436 Discussion

437 Mapping the molecular and physiological basis of life-history variation is one of the key goals of  
438 evolutionary biology. Life-history diversity within and among species is ultimately determined by  
439 energy use (Lailvaux & Husak, 2014), in which adipose tissue and mitochondria functions have a  
440 central role. In this study, we provide a workflow that integrates adipose tissue mitochondrial  
441 respiration into the life-history theory framework in Atlantic salmon. Our results suggest that  
442 mitochondrial phenotypes exhibit variation associated with different backgrounds (i.e.,  
443 sex/maturation, and age-at-maturity genotype). Consequently, we propose that energy generation  
444 and dissipation in the adipose tissue may have a role in the physiological determination of age at  
445 maturity via the *vgll3* genomic region. As some of the associations we observed were significant, we  
446 use the results to build novel, informed hypotheses on the potential mechanistic links between *vgll3*  
447 genotype and adipose tissue growth. Our results guide future work to test these hypotheses with  
448 larger experimental designs and point to the potential value of integrating adipose tissue  
449 mitochondrial phenotypes with life-history variation in the wild.

450

451 Overall, we verified the feasibility of measuring visceral adipose tissue mitochondrial respiration in  
452 large-sized (1 kg) Atlantic salmon. The respiration rates increased with the addition of substrates for  
453 CI and CII -mediated electron transfer, as expected. We found that visceral adipose tissue  
454 mitochondria relied more on NADH-driven CI-mediated than succinate-driven CII-mediated  
455 respiration (Fig. 4 & 5). Since NADH is generated via many different cellular processes including  
456 glycolysis, citric acid cycle and fatty acid oxidation, the activity of these cellular processes can  
457 regulate adipose tissue OXPHOS. The respiration rates were much lower than what had been  
458 earlier reported in salmonids from aerobically more active tissues, such as muscle or intestine (Brijs  
459 et al., 2017; K. Salin et al., 2016), but this was an expected outcome since adipose tissue is mostly  
460 composed of lipids (Nanton et al., 2007). Despite the lower rate of mitochondrial respiration in  
461 adipose tissue, the L/P ratio indicated that approximately 30% of mitochondrial respiration was  
462 related to proton leak, which is similar to the levels reported previously in fish intestine (Brijs et al.,  
463 2017), but higher than that reported in gill (Dawson, Millet, Selman, & Metcalfe, 2020), or muscle

464 and liver (Salin, Auer, Anderson, Selman, & Metcalfe, 2016), though it should be noted that the  
465 protocols used in measuring Leak respiration often differ between studies. As expected, CI&CII-  
466 linked respiratory leak through the entire electron transport chain (Leak Omy) was higher than CI-  
467 linked respiratory leak (Leak CI) in our study. This confirms that it is feasible to measure both  
468 coupled and uncoupled respiration in visceral fat from Atlantic salmon.

469  
470 Although we showed that about 40 mg of visceral adipose tissue, measured at 12 °C, provides a  
471 reasonable output as stated above, the demanding nature of the procedure due to logistic and  
472 physiological complexities should be noted. For example, adipose tissue quantity varies between  
473 individuals, and comparatively large tissue samples are required (previous studies have used, e.g.,  
474 8 mg from gill tissue (Dawson et al., 2020)). We also lost data points from the lowest respiration  
475 activity, i.e., three out of 16 of our measurements were unreliable for Leak CI, which could have  
476 been avoided by using a higher amount of initial material. Even more tissue would be required to  
477 repeat the measurements for each biological replicate, which was not feasible here due to taking  
478 samples for several analyses from the same fish, though previous studies in fish have found  
479 consistent mitochondrial respiration between technical replicates (Brijs et al., 2017; Dawson et al.,  
480 2020). Finally, it should be noted that since the sampled tissue can be stored only up to a few hours  
481 before the respiration measurements (unless a longer storage time is validated for this tissue (Rees,  
482 Reemeyer, & Irving, 2022)), coordination between the laboratory and the field (or rearing facilities) is  
483 demanding when research is conducted on adult-sized salmonids.

484  
485 Despite the low power of the analyses due to low sample size, we detected significantly higher  
486 CI&CII-mediated respiration and CI&CII-linked respiratory leak, and marginally higher coupling  
487 capacity in immature female salmon with the *vgll3* late maturation genotype than in those with the  
488 early maturation genotype. These preliminary results may provide insight into mechanistic  
489 explanations for how variation in maturation timing is linked to *vgll3* genotype, for which we  
490 postulate below two distinct but potentially complementary hypotheses.

491  
492 The first hypothesis concerns resource allocation to and from the lipid deposits in adipose tissue.  
493 Maturation in Atlantic salmon is a physiological trait with a genetic threshold mediated by condition  
494 factor possibly via lipid accumulation (Thorpe, 2007). Concordantly, a previous study (Debes et al.,  
495 2021) suggested that *vgll3*-associated early maturation in males was mediated by a higher condition  
496 factor. In line with these previous findings, and with our results, we hypothesise that the higher  
497 mitochondrial respiration in the adipose tissue of immature salmon with a late maturation genotype

498 leads to reduced lipid storage, contributing to delayed maturation. Mitochondrial respiration typically  
499 increases during fasting – a state that is characterized by active catabolic metabolism. It is therefore  
500 tempting to speculate that the mitochondrial phenotype of the *vgll3* late maturation genotype could  
501 indicate active catabolic metabolism in adipose tissue. The high mitochondrial respiratory capacity  
502 could enhance the oxidation of energy substrates and subsequently reduce the size of adipose  
503 tissue depots in salmon carrying the *vgll3* late maturation genotype compared to the early  
504 maturation genotype. In line with this hypothesis, increased mitochondrial fatty acid oxidation in  
505 adipose tissue has been observed to lead to a lean phenotype in mice (Flachs, Rossmeisl, Kuda, &  
506 Kopecky, 2013), and reduced mitochondrial respiration is related to adipocyte hypertrophy in a cell  
507 line (Baldini et al., 2021). Further, a negative correlation between adiposity (body mass index, BMI)  
508 and respiration of isolated mitochondria from adipose tissue was observed in humans (Fischer et  
509 al., 2015). In our study, neither genotype nor mitochondrial respiration was associated with body  
510 condition of fish (analogous to BMI). A lack of *vgll3* genotype effect on body condition in salmon was  
511 also found in the same cohort as the fish we studied (Åsheim et al., 2022). However, these results  
512 do not contradict our hypothesis since body condition effects may be manifested at a different time  
513 or life-stage (Debes et al., 2021), or alternatively, was not observed due to low statistical power. For  
514 instance, salmon with the late maturation genotype could be burning their adipose tissue at a higher  
515 rate during the winter (differences in lipid utilisation have also been shown in relation to migration in  
516 juvenile salmon (Morgan, McCarthy, & Metcalfe, 2002)), which would result in faster depletion of  
517 energy reserves compared to the early maturation genotype. Subsequently, the depletion of lipid  
518 reserve could delay maturation because the amount of adipose tissue in the spring is an important  
519 determinant of salmon maturation probability the following autumn (Rowe et al., 1991).

520

521 The second hypothesis we propose is based on the finding that salmon with the *vgll3* late  
522 maturation genotype tended to have more actively working mitochondria due to a higher coupling  
523 capacity, P/E ratio. In other words, electron transfer in fish with late maturation genotype was almost  
524 maximally coupled, while coupling was only up to ~70% in fish with the early maturation genotype.  
525 In the white adipose tissue of obese humans, coupling capacities of 77-83% (with an increasing  
526 trend during weight loss) have been observed (Hansen et al., 2015). Thus, the adipose tissue  
527 coupling capacity in salmon with the early maturation genotype was lower compared to that in  
528 obese humans, and the higher coupling capacity in salmon with late maturation genotypes is in line  
529 with active catabolic metabolism. Because coupling capacity reflects the proportion of coupled  
530 respiration from the theoretical maximum respiration, we hypothesise that it could affect the  
531 resource acquisition of salmon, especially if the effect is consistent across tissues. Specifically, the



532 lower coupling capacity in early vs. late maturation genotype could allow the fish with early  
533 maturation genotype to increase coupled respiration more during high energy demand and changes  
534 in environmental conditions. This could happen if the remaining electron transfer capacity was used  
535 preferentially to increase ATP synthesis instead of leak respiration. The mitochondria of salmon with  
536 late maturation genotype were already near-maximally coupled despite the relatively high food  
537 availability in this study (except for a 2 d-period without feeding prior to sample collection). Thus  
538 salmon with the late maturation genotype may respond relatively poorly to increases in energy  
539 demand or stress (Sokolova, 2018), and subsequently reserve less energy available to invest into  
540 growth, maturation and ultimately survival. Such inherent high coupling capacity of salmon with the  
541 late maturation genotype may indicate that they could be more vulnerable to low food conditions  
542 such as during winters in freshwater (Mogensen & Post, 2012) or in the sea (Czorlich, Aykanat,  
543 Erkinaro, Orell, & Primmer, 2022). In line with this, a lower aerobic scope at the whole animal level –  
544 indicating lower capacity for aerobic metabolism beyond self-maintenance – in juvenile salmon with  
545 the late maturation genotype was also found by Prokkola et al., (2022). Further, the lower coupling  
546 capacity of the late maturation genotype matches the distribution of salmon with contrasting age-at-  
547 maturity in the wild, where individuals maturing later spawn typically in larger rivers that are likely  
548 more environmentally stable. To explicitly test for this hypothesis, future work should focus to detail  
549 changes in the P/E ratio by simultaneously measuring leak respiration and ATP production, which  
550 would better characterise the metabolic response, e.g., to low food availability and fasting, in  
551 salmon with different *vgll3* genotypes.

552  
553 The molecular pathways that could link *vgll3* to mitochondrial respiration are not well known. In  
554 humans and mice, *vgll3* is a cofactor binding to TEA domain -containing (TEAD) transcription  
555 factors that regulates tissue differentiation pathways, such as adipogenesis and myogenesis, as  
556 well as pathways that regulate development and remodelling of tissue composition and organ and  
557 cell size, such as hippo signalling pathway (Figeac et al., 2019; Halperin et al., 2013; Hori et al.,  
558 2020). In Atlantic salmon, the widespread expression of *vgll3* is correlated with factors in the Hippo  
559 pathway (i.e. YAP, and TEAD) (Kurko et al., 2020) suggesting a functional analogy in salmon with  
560 mammals. Intriguingly, the same pathways also control mitochondrial biogenesis and function  
561 (Huang et al., 2018; Liu et al., 2020; Mammoto, Muyleart, Kadlec, Gutterman, & Mammoto, 2018),  
562 further supporting that *vgll3* genetic variation might affect mitochondrial functional variation.

563  
564 We also detected sex and/or maturation effect on mtDNA amount, where (mature) males had a  
565 higher mtDNA amount (relative to gDNA) in adipose tissue than (immature) females – although



566 there were no sex differences in mitochondrial respiration. Differences in adipose tissue processes  
567 may emerge between mature and immature individuals, because salmon consume a large part of  
568 their adipose tissue to support the high energy demand of maturation (Jonsson, Jonsson, &  
569 Hansen, 1991; Rowe et al., 1991). A previous study also suggests that sex-specific maturation  
570 schedules could be mediated by non-visceral lipid storage, e.g., in muscle (House et al., 2021).  
571 Hence, future studies that partition sex and maturation status effects across tissue types would be  
572 valuable to assess the role mitochondrial variation in relation to these two phenotypes.  
573

## 574 Conclusions

575 Adipose tissue is central to maturation as well as energy homeostasis but very little is known about  
576 how these two processes could be genetically interlinked. Our proof of principle study showed the  
577 feasibility of studying adipose tissue mitochondrial respiration in salmon and yielded insightful  
578 preliminary results from which we generated informed hypotheses for future research. To further  
579 integrate adipose tissue metabolism into a life-history evolution framework, measurements of  
580 mitochondrial respiration in salmon with different *vgll3* genotypes could be combined with analyses  
581 of lipogenesis and lipolysis (i.e., lipid synthesis and release, respectively) for example using gene  
582 expression, and lipid quantification with histochemistry. Moreover, mitochondrial respiration  
583 measurements could be combined with measurements of reactive oxygen species and the  
584 effectiveness of ATP synthesis (ATP/O) (Salin et al., 2019; Salin et al., 2018). Ultimately, to  
585 generalise the role of mitochondrial respiration and of coupling capacity in life-history evolution,  
586 studies would need to address life-stage specific genetic effects, and measurements should be  
587 extended to non-adipose tissues. Given the common physiological roles and functions of visceral  
588 white adipose tissue in salmon and humans (Salmeron, 2018), a better understanding of these  
589 functions in salmon may also facilitate its use as a new model species for obesity research.  
590 Conversely, our study provides an example of how a more advanced understanding of metabolic  
591 disorders and obesity can be harnessed to address questions relevant for ecology and evolution.

592

## 593 Acknowledgements

594 We thank Petra Liljeström, Mikko Immonen, Paul Bangura, and numerous interns for help in fish  
595 rearing at Lammi Biological Station, the Tissue Preparation and Histochemistry Unit Meilahti,  
596 University of Helsinki, for the cryosectioning and staining, and Antti Isomäki for advice on cell size  
597 measurements. Histological Imaging was supported by HiLIFE and the Faculty of Medicine,

598 University of Helsinki, and Biocenter Finland. The study was funded by the Academy of Finland  
599 (1328860 and 1325964 for T. A., 335443, 314383, 272376 and the Profi6 336449 funding for E.P.,  
600 and 307593, 302873, 327255, and 342851 for C.R.P.), by the European Research Council under  
601 the European Articles Union's Horizon 2020 research and innovation program (grant no. 742312),  
602 and the University of Helsinki.

603

## 604 **Appendices and supplemental material**

605 Table A1. Primer details.

606 Supplemental material 1. Xlsx file. Table S1. The data obtained in this study.

607 Supplemental material 2. Figures S1–S4 and Tables S3–S4.

608 Supplemental material 3. Txt file. A macro for adipocyte size quantification in ImageJ.

609

## 610 **Data availability**

611 The final data from this study is available in Table S1. The data, R codes for analyses and figures,  
612 and the images of adipose tissue sections are available in Zenodo

613 (<https://doi.org/10.5281/zenodo.6899961>).

614

## 615 **References**

616

617

- 618 Åsheim, E. R., Debes, P. V., House, A., Niemelä, P. T., Siren, J. P., Erkinaro, J., & Primmer, C. R.  
619 (2022). Strong effects of temperature, population and age-at-maturity genotype on  
620 maturation probability for Atlantic salmon in a common garden setting. *bioRxiv*,  
621 2022.2007.2022.501167. doi:10.1101/2022.07.22.501167
- 622 Baldini, F., Fabbri, R., Eberhagen, C., Voci, A., Portincasa, P., Zischka, H., & Vergani, L. (2021).  
623 Adipocyte hypertrophy parallels alterations of mitochondrial status in a cell model for adipose  
624 tissue dysfunction in obesity. *Life Sciences*, 265. doi:10.1016/j.lfs.2020.118812
- 625 Bankhead, P., Loughrey, M. B., Fernandez, J. A., Dombrowski, Y., McArt, D. G., Dunne, P. D., . . .  
626 Hamilton, P. W. (2017). QuPath: Open source software for digital pathology image analysis.  
627 *Sci Rep*, 7. doi:10.1038/s41598-017-17204-5
- 628 Barson, N. J., Aykanat, T., Hindar, K., Baranski, M., Bolstad, G. H., Fiske, P., . . . Primmer, C. R.  
629 (2015). Sex-dependent dominance at a single locus maintains variation in age at maturity in  
630 salmon. *Nature*, 528(7582), 405-408. doi:10.1038/nature16062
- 631 Boudina, S., & Graham, T. E. (2014). Mitochondrial function/dysfunction in white adipose tissue.  
632 *Experimental Physiology*, 99(9), 1168-1178. doi:10.1113/expphysiol.2014.081414
- 633 Brand, M. D. (2005). The efficiency and plasticity of mitochondrial energy transduction. *Biochemical*  
634 *Society Transactions*, 33(Pt 5), 897-904. doi:10.1042/BST0330897

- 635 Brijs, J., Sandblom, E., Sundh, H., Grans, A., Hinchcliffe, J., Ekstrom, A., . . . Pichaud, N. (2017).  
636 Increased mitochondrial coupling and anaerobic capacity minimizes aerobic costs of trout in  
637 the sea. *Sci Rep*, 7, 45778. doi:10.1038/srep45778
- 638 Canto, C., & Garcia-Roves, P. M. (2015). High-Resolution Respirometry for Mitochondrial  
639 Characterization of Ex Vivo Mouse Tissues. *Current protocols in mouse biology*, 5(2), 135-  
640 153. doi:10.1002/9780470942390.mo140061
- 641 Chacko, B. K., Kramer, P. A., Ravi, S., Benavides, G. A., Mitchell, T., Dranka, B. P., . . . Darley-  
642 Usmar, V. M. (2014). The Bioenergetic Health Index: a new concept in mitochondrial  
643 translational research. *Clinical Science*, 127(5-6), 367-373. doi:10.1042/cs20140101
- 644 Cousminer, D. L., Berry, D. J., Timpson, N. J., Ang, W., Thiering, E., Byrne, E. M., . . . Early Growth  
645 Genetics, C. (2013). Genome-wide association and longitudinal analyses reveal genetic loci  
646 linking pubertal height growth, pubertal timing and childhood adiposity. *Human Molecular  
647 Genetics*, 22(13), 2735-2747. doi:10.1093/hmg/ddt104
- 648 Czorlich, Y., Aykanat, T., Erkinaro, J., Orell, P., & Primmer, C. R. (2022). Rapid evolution in salmon  
649 life history induced by direct and indirect effects of fishing. *Science*, eabg5980.  
650 doi:10.1126/science.abg5980
- 651 Dawson, N. J., Millet, C., Selman, C., & Metcalfe, N. B. (2020). Measurement of mitochondrial  
652 respiration in permeabilized fish gills. *Journal of Experimental Biology*, 223(Pt 4).  
653 doi:10.1242/jeb.216762
- 654 De Pauw, A., Tejerina, S., Raes, M., Keijer, J., & Arnould, T. (2009). Mitochondrial (Dys)function in  
655 Adipocyte (De)differentiation and Systemic Metabolic Alterations. *American Journal of  
656 Pathology*, 175(3), 927-939. doi:10.2353/ajpath.2009.081155
- 657 Debes, P. V., Piavchenko, N., Ruokolainen, A., Ovaskainen, O., Moustakas-Verho, J. E., Parre, N., .  
658 . . Primmer, C. R. (2021). Polygenic and major-locus contributions to sexual maturation  
659 timing in Atlantic salmon. *Molecular Ecology*, 30(18), 4505-4519. doi:10.1111/mec.16062
- 660 Dennery, P. A. (2010). Oxidative stress in development: Nature or nurture? *Free Radical Biology  
661 and Medicine*, 49(7), 1147-1151. doi:10.1016/j.freeradbiomed.2010.07.011
- 662 Djafarzadeh, S., & Jakob, S. M. (2017). High-resolution Respirometry to Assess Mitochondrial  
663 Function in Permeabilized and Intact Cells. *Jove-Journal of Visualized Experiments*(120).  
664 doi:10.3791/54985
- 665 Elks, C. E., Perry, J. R., Sulem, P., Chasman, D. I., Franceschini, N., He, C., . . . Murray, A. (2010).  
666 Thirty new loci for age at menarche identified by a meta-analysis of genome-wide  
667 association studies. *Nature Genetics*, 42(12), 1077-1085. doi:10.1038/ng.714
- 668 Figeac, N., Mohamed, A. D., Sun, C., Schoenfelder, M., Matallanas, D., Garcia-Munoz, A., . . .  
669 Wackerhage, H. (2019). VGLL3 operates via TEAD1, TEAD3 and TEAD4 to influence  
670 myogenesis in skeletal muscle. *Journal of Cell Science*, 132(13). doi:10.1242/jcs.225946
- 671 Fischer, B., Schoettl, T., Schempp, C., Fromme, T., Hauner, H., Klingenspor, M., & Skurk, T. (2015).  
672 Inverse relationship between body mass index and mitochondrial oxidative phosphorylation  
673 capacity in human subcutaneous adipocytes. *American Journal of Physiology-Endocrinology  
674 and Metabolism*, 309(4), E380-E387. doi:10.1152/ajpendo.00524.2014
- 675 Flachs, P., Rossmesl, M., Kuda, O., & Kopecky, J. (2013). Stimulation of mitochondrial oxidative  
676 capacity in white fat independent of UCP1: A key to lean phenotype. *Biochimica Et  
677 Biophysica Acta-Molecular and Cell Biology of Lipids*, 1831(5), 986-1003.  
678 doi:10.1016/j.bbalip.2013.02.003
- 679 Fleming, I. A. (1998). Pattern and variability in the breeding system of Atlantic salmon (*Salmo salar*),  
680 with comparisons to other salmonids. *Canadian Journal of Fisheries and Aquatic Sciences*,  
681 55, 59-76. doi:DOI 10.1139/cjfas-55-S1-59
- 682 Guo, W., Jiang, L., Bhasin, S., Khan, S. M., & Swerdlow, R. H. (2009). DNA extraction procedures  
683 meaningfully influence qPCR-based mtDNA copy number determination. *Mitochondrion*,  
684 9(4), 261-265. doi:10.1016/j.mito.2009.03.003

- 685 Halperin, D. S., Pan, C., Lusi, A. J., & Tontonoz, P. (2013). Vestigial-like 3 is an inhibitor of  
686 adipocyte differentiation. *Journal of Lipid Research*, *54*(2), 473-481. doi:10.1194/jlr.M032755
- 687 Hansen, M., Lund, M. T., Gregers, E., Kraunsoe, R., Van Hall, G., Helge, J. W., & Dela, F. (2015).  
688 Adipose tissue mitochondrial respiration and lipolysis before and after a weight loss by diet  
689 and RYGB. *Obesity*, *23*(10), 2022-2029. doi:10.1002/oby.21223
- 690 Heinonen, S., Jokinen, R., Rissanen, A., & Pietilainen, K. H. (2020). White adipose tissue  
691 mitochondrial metabolism in health and in obesity. *Obes Rev*, *21*(2), e12958.  
692 doi:10.1111/obr.12958
- 693 Hood, W. R., Austad, S. N., Bize, P., Jimenez, A. G., Montooth, K. L., Schulte, P. M., . . . Salin, K.  
694 (2018). The Mitochondrial Contribution to Animal Performance, Adaptation, and Life-History  
695 Variation INTRODUCTION. *Integrative and Comparative Biology*, *58*(3), 480-485.  
696 doi:10.1093/icb/icy089
- 697 Hori, N., Okada, K., Takakura, Y., Takano, H., Yamaguchi, N., & Yamaguchi, N. (2020). Vestigial-  
698 like family member 3 (VGLL3), a cofactor for TEAD transcription factors, promotes cancer  
699 cell proliferation by activating the Hippo pathway. *Journal of Biological Chemistry*, *295*(26),  
700 8798-8807. doi:10.1074/jbc.RA120.012781
- 701 House, A. H., Debes, P. V., Kurko, J., Erkinaro, J., Kakela, R., & Primmer, C. R. (2021). Sex-  
702 specific lipid profiles in the muscle of Atlantic salmon juveniles. *Comparative Biochemistry  
703 and Physiology D-Genomics & Proteomics*, *38*. doi:10.1016/j.cbd.2021.100810
- 704 Huang, S., Wang, X., Wu, X., Yu, J., Li, J., Huang, X., . . . Ge, H. (2018). Yap regulates  
705 mitochondrial structural remodeling during myoblast differentiation. *American Journal of  
706 Physiology: Cell Physiology*, *315*(4), C474-C484. doi:10.1152/ajpcell.00112.2018
- 707 Jokinen, R., Pirnes-Karhu, S., Pietilainen, K. H., & Pirinen, E. (2017). Adipose tissue NAD(+)-  
708 homeostasis, sirtuins and poly(ADP-ribose) polymerases - important players in mitochondrial  
709 metabolism and metabolic health. *Redox Biology*, *12*, 246-263.  
710 doi:10.1016/j.redox.2017.02.011
- 711 Jonsson, N., Jonsson, B., & Hansen, L. P. (1991). Energetic cost of spawning in male and female  
712 Atlantic salmon (*Salmo salar* L.). *Journal of Fish Biology*, *39*(5), 739-744. doi:10.1111/j.1095-  
713 8649.1991.tb04403.x
- 714 Kadenbach, B. (2003). Intrinsic and extrinsic uncoupling of oxidative phosphorylation. *Biochimica Et  
715 Biophysica Acta-Bioenergetics*, *1604*(2), 77-94. doi:10.1016/s0005-2728(03)00027-6
- 716 Koch, R. E., Buchanan, K. L., Casagrande, S., Crino, O., Dowling, D. K., Hill, G. E., . . . Stier, A.  
717 (2021). Integrating Mitochondrial Aerobic Metabolism into Ecology and Evolution. *Trends in  
718 Ecology & Evolution*, *36*(4), 321-332. doi:10.1016/j.tree.2020.12.006
- 719 Kurko, J., Debes, P. V., House, A. H., Aykanat, T., Erkinaro, J., & Primmer, C. R. (2020).  
720 Transcription Profiles of Age-at-Maturity-Associated Genes Suggest Cell Fate Commitment  
721 Regulation as a Key Factor in the Atlantic Salmon Maturation Process. *G3-Genes Genomes  
722 Genetics*, *10*(1), 235-246. doi:10.1534/g3.119.400882
- 723 Lailvaux, S. P., & Husak, J. F. (2014). The life-history of whole-organism performance. *Quarterly  
724 Review of Biology*, *89*(4), 285-318. doi:10.1086/678567
- 725 Liu, R., Jagannathan, R., Sun, L., Li, F., Yang, P., Lee, J., . . . Moulik, M. (2020). Tead1 is essential  
726 for mitochondrial function in cardiomyocytes. *American Journal of Physiology: Heart and  
727 Circulatory Physiology*, *319*(1), H89-H99. doi:10.1152/ajpheart.00732.2019
- 728 Mammoto, A., Muyleart, M., Kadlec, A., Gutterman, D., & Mammoto, T. (2018). YAP1-TEAD1  
729 signaling controls angiogenesis and mitochondrial biogenesis through PGC1alpha.  
730 *Microvasc Res*, *119*, 73-83. doi:10.1016/j.mvr.2018.04.003
- 731 Martin, A. S. G., & Obin, M. S. (2006). Obesity and the role of adipose tissue in inflammation and  
732 metabolism. *American Journal of Clinical Nutrition*, *83*(2), 461S-465S.  
733 doi:10.1093/ajcn/83.2.461s
- 734 Mobley, K. B., Aykanat, T., Czorlich, Y., House, A., Kurko, J., Miettinen, A., . . . Primmer, C. R.  
735 (2021). Maturation in Atlantic salmon (*Salmo salar*, Salmonidae): a synthesis of ecological,



- 736 genetic, and molecular processes. *Reviews in Fish Biology and Fisheries*, 31(3), 523-571.  
737 doi:10.1007/s11160-021-09656-w
- 738 Mogensen, S., & Post, J. R. (2012). Energy allocation strategy modifies growth-survival trade-offs in  
739 juvenile fish across ecological and environmental gradients. *Oecologia*, 168(4), 923-933.  
740 doi:10.1007/s00442-011-2164-0
- 741 Mohamed-Ali, V., Pinkney, J. H., & Coppack, S. W. (1998). Adipose tissue as an endocrine and  
742 paracrine organ. *International Journal of Obesity*, 22(12), 1145-1158.  
743 doi:10.1038/sj.ijo.0800770
- 744 Morgan, I. J., McCarthy, I. D., & Metcalfe, N. B. (2002). The influence of life-history strategy on lipid  
745 metabolism in overwintering juvenile Atlantic salmon. *Journal of Fish Biology*, 60(3), 674-  
746 686. doi:10.1006/jfbi.2002.1886
- 747 Nanton, D. A., Vegusdal, A., Rørå, A. M. B., Ruyter, B., Baeverfjord, G., & Torstensen, B. E. (2007).  
748 Muscle lipid storage pattern, composition, and adipocyte distribution in different parts of  
749 Atlantic salmon (*Salmo salar*) fed fish oil and vegetable oil. *Aquaculture*, 265(1-4), 230-243.  
750 doi:10.1016/j.aquaculture.2006.03.053
- 751 Norgan, N. G. (1997). The beneficial effects of body fat and adipose tissue in humans. *Int J Obes*  
752 *Relat Metab Disord*, 21(9), 738-746. doi:10.1038/sj.ijo.0800473
- 753 Ottaviani, E., Malagoli, D., & Franceschi, C. (2011). The evolution of the adipose tissue: A neglected  
754 enigma. *General and Comparative Endocrinology*, 174(1), 1-4.  
755 doi:10.1016/j.ygcen.2011.06.018
- 756 Pfaffl, M. W. (2001). A new mathematical model for relative quantification in real-time RT-PCR.  
757 *Nucleic Acids Research*, 29, -.
- 758 Prokkola, J. M., Asheim, E. R., Morozov, S., Bangura, P., Erkinaro, J., Ruokolainen, A., . . .  
759 Aykanat, T. (2022). Genetic coupling of life-history and aerobic performance in Atlantic  
760 salmon. *Proc Biol Sci*, 289(1967), 20212500. doi:10.1098/rspb.2021.2500
- 761 R Core Team. (2019). R: A language and environment for statistical computing. In: R Foundation for  
762 Statistical Computing, Vienna, Austria.
- 763 Rees, B. B., Reemeyer, J. E., & Irving, B. A. (2022). Interindividual variation in maximum aerobic  
764 metabolism varies with gill morphology and myocardial bioenergetics in Gulf killifish. *Journal*  
765 *of Experimental Biology*, 225(12). doi:10.1242/jeb.243680
- 766 Robin, E. D., & Wong, R. (1988). Mitochondrial-DNA molecules and virtual number of mitochondria  
767 per cell in mammalian cells. *Journal of Cellular Physiology*, 136(3), 507-513.  
768 doi:10.1002/jcp.1041360316
- 769 Rowe, D. K., Thorpe, J. E., & Shanks, A. M. (1991). Role of fat stores in the maturation of male  
770 Atlantic salmon (*Salmo salar*) parr. *Canadian Journal of Fisheries and Aquatic Sciences*,  
771 48(3), 405-413. doi:10.1139/f91-052
- 772 Ruijter, J. M., Ramakers, C., Hoogaars, W. M. H., Karlen, Y., Bakker, O., van den Hoff, M. J. B., &  
773 Moorman, A. F. M. (2009). Amplification efficiency: linking baseline and bias in the analysis  
774 of quantitative PCR data. *Nucleic Acids Research*, 37, -.
- 775 Salin, K., Auer, S. K., Anderson, G. J., Selman, C., & Metcalfe, N. B. (2016). Inadequate food intake  
776 at high temperatures is related to depressed mitochondrial respiratory capacity. *Journal of*  
777 *Experimental Biology*, 219(9), 1356-1362. doi:10.1242/jeb.133025
- 778 Salin, K., Auer, S. K., Rey, B., Selman, C., & Metcalfe, N. B. (2015). Variation in the link between  
779 oxygen consumption and ATP production, and its relevance for animal performance. *Proc*  
780 *Biol Sci*, 282(1812), 20151028. doi:10.1098/rspb.2015.1028
- 781 Salin, K., Auer, S. K., Rudolf, A. M., Anderson, G. J., Selman, C., & Metcalfe, N. B. (2016). Variation  
782 in Metabolic Rate among Individuals Is Related to Tissue-Specific Differences in  
783 Mitochondrial Leak Respiration. *Physiological and Biochemical Zoology*, 89(6), 511-523.  
784 doi:10.1086/688769
- 785 Salin, K., Villasevil, E. M., Anderson, G. J., Lamarre, S. G., Melanson, C. A., McCarthy, I., . . .  
786 Metcalfe, N. B. (2019). Differences in mitochondrial efficiency explain individual variation in

- 787 growth performance. *Proceedings of the Royal Society Biological Sciences Series B*,  
788 286(1909), 1-8.
- 789 Salin, K., Villasevil, E. M., Anderson, G. J., Selman, C., Chinopoulos, C., & Metcalfe, N. B. (2018).  
790 The RCR and ATP/O Indices Can Give Contradictory Messages about Mitochondrial  
791 Efficiency. *Integrative and Comparative Biology*, 58(3), 486-494. doi:10.1093/icb/icy085
- 792 Salmeron, C. (2018). Adipogenesis in fish. *Journal of Experimental Biology*, 221(Pt Suppl 1).  
793 doi:10.1242/jeb.161588
- 794 Sinclair-Waters, M., Odegard, J., Korsvoll, S. A., Moen, T., Lien, S., Primmer, C. R., & Barson, N. J.  
795 (2020). Beyond large-effect loci: large-scale GWAS reveals a mixed large-effect and  
796 polygenic architecture for age at maturity of Atlantic salmon. *Genetics Selection Evolution*,  
797 52(1), 9. doi:10.1186/s12711-020-0529-8
- 798 Sokolova, I. (2018). Mitochondrial Adaptations to Variable Environments and Their Role in Animals'  
799 Stress Tolerance. *Integrative and Comparative Biology*, 58(3), 519-531.  
800 doi:10.1093/icb/icy017
- 801 Thorpe, J. E. (2007). Maturation responses of salmonids to changing developmental opportunities.  
802 *Marine Ecology Progress Series*, 335, 285-288. doi:10.3354/meps335285
- 803 Wickham, H. (2009). ggplot2: Elegant Graphics for Data Analysis. *Ggplot2: Elegant Graphics for*  
804 *Data Analysis*, 1-212. doi:10.1007/978-0-387-98141-3
- 805 Ye, J., Coulouris, G., Zaretskaya, I., Cutcutache, I., Rozen, S., & Madden, T. L. (2012). Primer-  
806 BLAST: A tool to design target-specific primers for polymerase chain reaction. *BMC*  
807 *Bioinformatics*, 13. doi:10.1186/1471-2105-13-134  
808
